# Supplementary material
Source: PubMed Central journal article supplement (PMC7185620)
Supplement: mmc1.pdf [file mmc1.pdf]

Supplementary data

# *Giardia* and *Cryptosporidium* in mammalian wildlife – current status and future needs

Amber J. Appelbee<sup>1</sup>, R.C. Andrew Thompson<sup>1</sup> and Merle E. Olson<sup>2</sup>

<sup>1</sup>World Health Organization Collaborating Centre for the Molecular Epidemiology of Parasitic Infections, School of Veterinary and Biomedical Science, Murdoch University, South Street, Murdoch 6150, Australia

<sup>2</sup>Department of Microbiology and Infectious Diseases, University of Calgary, 3330 Hospital Drive NW, Calgary, Canada, T2N 4N1

Corresponding author: Appelbee, A.J. (ajappelb@ucalgary.ca).

**Table S1. A selection of worldwide prevalence studies of *Giardia* spp. in free-living mammalian wildlife. Prevalence data that included molecular analysis are indicated by an asterisk (\*)**

| Country                                        | Host species                                        | % Positive (sample size) | Refs |
|------------------------------------------------|-----------------------------------------------------|--------------------------|------|
| Australia                                      | feral cat ( <i>felis spp.</i> )                     | 21% (39)                 | [1]  |
|                                                | quenda ( <i>Isoodon obesulus</i> )                  | 1% (77)                  | [2]  |
|                                                | house mouse ( <i>Mus musculus</i> )                 | 25% (129)                | [3]  |
| Brazil                                         | hairy-tailed bolo mouse ( <i>Bolomys lasiurus</i> ) | 14% (7)                  | [4]  |
|                                                | water rat ( <i>Nectomys squamipes</i> )             | 34% (168)                | [4]  |
|                                                | black rat ( <i>Rattus rattus</i> )                  | 100% (3)                 | [4]  |
| Canada                                         | dall sheep ( <i>Ovis dalli</i> )                    | 40% (5)                  | [5]  |
|                                                | coyote ( <i>Canis latrans</i> )                     | 66% (3)                  | [5]  |
|                                                | wolf ( <i>Canis occidentalis</i> )                  | 33% (3)                  | [5]  |
|                                                | ringed seal ( <i>Phoca hispida</i> )                | 20% (15)                 | [6]  |
|                                                | harp seal ( <i>Phoca groenlandica</i> )             | 50% (30)                 | [7]  |
|                                                | harbour seal ( <i>Phoca vitulina</i> )              | 25% (16)                 | [7]  |
|                                                | grey seal ( <i>Halichoerus grypus</i> )             | 17% (6)                  | [7]  |
|                                                | brown bear ( <i>Ursus arctos</i> )                  | 100% (3)                 | [5]  |
|                                                | beaver ( <i>Castor canadensis</i> )                 | 15% (94)                 | [8]  |
|                                                | beaver ( <i>Castor canadensis</i> )                 | 4% (58)                  | [9]  |
|                                                | beaver ( <i>Castor canadensis</i> )                 | 4% (51)                  | [10] |
|                                                | beaver ( <i>Castor canadensis</i> )                 | 14% (14)                 | [5]  |
|                                                | beaver ( <i>Castor canadensis</i> )                 | 33% (27)                 | [11] |
|                                                | deer mouse ( <i>Peromyscus maniculatus</i> )        | 10% (50)                 | [9]  |
|                                                | wood rat ( <i>neotoma cinerea</i> )                 | 7% (15)                  | [10] |
|                                                | long-tailed vole ( <i>Microtus longicaudus</i> )    | 33% (3)                  | [9]  |
|                                                | meadow vole ( <i>Microtus pennsylvanicus</i> )      | 33% (6)                  | [9]  |
|                                                | meadow vole ( <i>Microtus pennsylvanicus</i> )      | 75% (6)                  | [10] |
|                                                | red-backed vole ( <i>Clethrionomys gapperi</i> )    | 95% (21)                 | [9]  |
|                                                | red-backed vole ( <i>Clethrionomys gapperi</i> )    | 86% (21)                 | [10] |
| heather vole ( <i>phenacomys intermedius</i> ) | 50% (2)                                             | [10]                     |      |
| muskrat ( <i>Ondatra zibethicus</i> )          | 25% (12)                                            | [5]                      |      |

|                                       |                                                          |                  |         |
|---------------------------------------|----------------------------------------------------------|------------------|---------|
| <b>Egypt</b>                          | Brown rat ( <i>Rattus norvegicus</i> )                   | 8% (39)          | [12]    |
| <b>Germany</b>                        | muskrat ( <i>Ondatra zibethicus</i> )                    | 75% (234)        | [13]    |
| <b>Japan</b>                          | large japanese field mouse ( <i>Apodemus speciosus</i> ) | 62% (58)         | [14]    |
|                                       | japanese field mouse ( <i>Apodemus argenteus</i> )       | 14% (29)         | [14]    |
|                                       | Japanese grass vole ( <i>Microtus montebelli</i> )       | 100% (7)         | [14]    |
| <b>Norway</b>                         | beaver ( <i>Castor fiber</i> )                           | 0% (241)         | [15]    |
| <b>Poland</b>                         | field mouse ( <i>Apodemus flavicollis</i> )              | 48% (209)        | [16]    |
|                                       | bank vole ( <i>Clethrionomys glareolus</i> )             | 94% (459)        | [16]    |
|                                       | common vole ( <i>Microtus arvalis</i> )                  | 96% (274)        | [16]    |
| <b>Rwanda</b>                         | Mountain gorilla ( <i>Gorilla gorilla beringei</i> )     | 3% (70)          | [17]    |
| <b>Saudi Arabia</b>                   | Hamadryas Baboon ( <i>Papio hamadryas</i> )              | 9% (115)         | [18]    |
|                                       | Hamadryas Baboon ( <i>Papio hamadryas</i> )              | 26% (633)        | [19]    |
| <b>Thailand</b>                       | Leopard ( <i>Panthera pardus</i> )                       | 2% (54)          | [20]    |
| <b>Uganda</b>                         | Olive babboon ( <i>Papio anubis</i> )                    | 58% (140)        | [21]    |
|                                       | Mountain gorilla ( <i>Gorilla gorilla beringei</i> )     | 2% (100)*        | [22,23] |
| <b>USA</b>                            | tule elk ( <i>Cervus elaphus nannodes</i> )              | 4% (82)*         | [24]    |
|                                       | elk ( <i>spp.</i> not reported)                          | 2% (115)         | [25]    |
|                                       | white-tailed deer ( <i>Odocoileus virginianus</i> )      | 1% (394)         | [26]    |
|                                       | white-tailed deer ( <i>Odocoileus virginianus</i> )      | 4% (28)*         | [27]    |
|                                       | coyote ( <i>Canis latrans</i> )                          | 4% (22)*         | [28]    |
|                                       | sea lion ( <i>Zalophus californianus</i> )               | 33% (6)*         | [29]    |
|                                       | northern racoon ( <i>Procyon lotor</i> )                 | 0% (128)         | [30]    |
|                                       | water shrew ( <i>Sorex palustris</i> )                   | 1 (8)            | [31]    |
|                                       | beaver ( <i>Castor canadensis</i> )                      | 33% (100)        | [32]    |
|                                       | beaver ( <i>Castor canadensis</i> )                      | 37% (790)        | [33]    |
|                                       | beaver ( <i>Castor canadensis</i> )                      | 0% (32)          | [34]    |
|                                       | beaver ( <i>Castor canadensis</i> )                      | 47% (1257)       | [35]    |
|                                       | beaver ( <i>Castor canadensis</i> )                      | 24% (313)        | [25]    |
|                                       | pocket gopher ( <i>Geomysidae sp.</i> )                  | 4 (9)            | [31]    |
|                                       | water vole ( <i>Microtus richardsoni</i> )               | 100% (23)        | [25]    |
|                                       | water vole ( <i>Microtus richardsoni</i> )               | 4 (not reported) | [31]    |
|                                       | long-tailed vole ( <i>Microtus longicaudus</i> )         | 100% (18)        | [25]    |
|                                       | Montane vole ( <i>Microtus montanus</i> )                | 100% (90)        | [31]    |
|                                       | Meadow vole ( <i>Microtus pennsylvanicus</i> )           | 2 (not reported) | [31]    |
|                                       | muskrat ( <i>Ondatra zibethicus</i> )                    | 96% (219)        | [33]    |
| muskrat ( <i>Ondatra zibethicus</i> ) | 83% (6)                                                  | [35]             |         |
| muskrat ( <i>Ondatra zibethicus</i> ) | 82% (189)                                                | [36]             |         |
| nutria ( <i>Myocastor coypus</i> )    | 73% (30)                                                 | [32]             |         |

**Table S2. A selection of worldwide prevalence studies of *Cryptosporidium* spp. in free-living mammalian wildlife. Prevalence data that included molecular analysis are indicated by an asterisk (\*)**

| Country   | Host species                                        | % Positive (sample size) | Refs    |
|-----------|-----------------------------------------------------|--------------------------|---------|
| Australia | grey kangaroo ( <i>Macropus giganteus</i> )         | 51 (not reported)*       | [37]    |
| Canada    | beaver ( <i>Castor canadensis</i> )                 | 2% (27)                  | [11]    |
| Denmark   | roe deer ( <i>Capreolus capreolus</i> )             | 2% (103)                 | [38]    |
| Egypt     | brown rat ( <i>Rattus norvegicus</i> )              | 43% (172)                | [12]    |
| Ethiopia  | olive babboon ( <i>Papio anubis</i> )               | 12% (59)                 | [39]    |
|           | vervet ( <i>Chlorocebus aethiops</i> )              | 29% (41)                 | [39]    |
| Finland   | bank vole ( <i>Clethrionomys glareolus</i> )        | 5% (41)                  | [40]    |
|           | field vole ( <i>Microtus agrestis</i> )             | 1% (131)                 | [40]    |
|           | tundra vole ( <i>Microtus oeconomus</i> )           | 0% (43)                  | [40]    |
| Italy     | red-squirrel ( <i>Sciurus vulgaris</i> )            | 32% (85)                 | [41]    |
| Japan     | japanese field mouse ( <i>Apodemus argenteus</i> )  | 8% (25)                  | [42]    |
|           | brown rat ( <i>Rattus norvegicus</i> )              | 16% (61)                 | [43]    |
|           | brown rat ( <i>Rattus norvegicus</i> )              | 8% (61)                  | [43]    |
|           | brown rat ( <i>Rattus norvegicus</i> )              | 27% (141)                | [44]    |
|           | brown rat ( <i>Rattus norvegicus</i> )              | 45% (47)                 | [44]    |
|           | black rat ( <i>Rattus rattus</i> )                  | 10% (175)                | [45]    |
|           | brown rat ( <i>Rattus norvegicus</i> )              | 4% (48)                  | [45]    |
| Kenya     | olive babboon ( <i>Papio anubis</i> )               | 28% (60)                 | [46]    |
|           | olive babboon ( <i>Papio anubis</i> )               | 28% (59)                 | [47]    |
|           | vervet ( <i>Chlorocebus aethiops</i> )              | 71% (58)                 | [47]    |
| Korea     | mice ( <i>Mus spp.</i> )                            | 30% (250)                | [48]    |
|           | brown rat ( <i>Rattus norvegicus</i> )              | 13% (195)                | [48]    |
| Norway    | moose ( <i>Alces alces</i> )                        | 0% (72)                  | [49]    |
|           | beaver ( <i>Castor canadensis</i> )                 | 0% (182)                 | [15]    |
| Poland    | common shrew ( <i>Sorex araneus</i> )               | 31% (16)                 | [50]    |
|           | beaver ( <i>Castor canadensis</i> )                 | 11% (19)                 | [51]    |
|           | yellow-necked mouse ( <i>Apodemus flavicollis</i> ) | 28% (209)*               | [16,52] |
|           | yellow-necked mouse ( <i>Apodemus flavicollis</i> ) | 15% (39)                 | [50]    |
|           | striped field mouse ( <i>Apodemus agrarius</i> )    | 1 (not reported)         | [51]    |
|           | field mouse ( <i>Apodemus spp.</i> )                | 24% (70)                 | [51]    |
|           | bank vole ( <i>Clethrionomys glareolus</i> )        | 71% (459)*               | [16,52] |
|           | bank vole ( <i>Clethrionomys glareolus</i> )        | 23% (102)                | [51]    |
|           | bank vole ( <i>Clethrionomys glareolus</i> )        | 20% (275)                | [50]    |
|           | common vole ( <i>Microtus arvalis</i> )             | 73% (274)*               | [16,52] |
|           | common vole ( <i>Microtus arvalis</i> )             | 4 (not reported)         | [51]    |
|           | muskrat ( <i>Ondatra zibethicus</i> )               | 55% (9)                  | [51]    |
| Spain     | white-toothed shrew ( <i>Crocidura russula</i> )    | 15% (88)                 | [53]    |
|           | woodmouse ( <i>Apodemus sylvaticus</i> )            | 49% (302)                | [53]    |
|           | bank vole ( <i>Clethrionomys glareolus</i> )        | 33% (49)                 | [53]    |
|           | algerian mouse ( <i>Mus spretus</i> )               | 32% (22)                 | [53]    |
| Tanzania  | wildebeests ( <i>Connochaetes gnou</i> )            | 27% (26)                 | [54]    |
|           | african Buffalo ( <i>Syncerus caffer</i> )          | 22% (36)                 | [54]    |

|                                                       |                                                                                   |                                      |          |
|-------------------------------------------------------|-----------------------------------------------------------------------------------|--------------------------------------|----------|
| Uganda                                                | zebra ( <i>Equus zebra</i> )                                                      | 28% (25)                             | [54]     |
|                                                       | olive babboon ( <i>Papio anubis</i> )                                             | 32% (140)*                           | [21]     |
|                                                       | mountain gorilla ( <i>Gorilla gorilla beringei</i> )                              | 11% (100)*                           | [23]     |
| UK                                                    | fallow deer and muntjac deer<br>( <i>Dama dama</i> and <i>Muntiacus reevesi</i> ) | 9% (58)                              | [55]     |
|                                                       | fox ( <i>Vulpes vulpes</i> )                                                      | 9% (23)                              | [55]     |
|                                                       | badger ( <i>Meles meles</i> )                                                     | 15% (26)                             | [55]     |
|                                                       | hedehog ( <i>Erinaceus europaeus</i> )                                            | 25% (4)                              | [55]     |
|                                                       | common and pygmy shrew<br>( <i>Sorex araneus</i> and <i>S. minutus</i> )          | 7% (30)                              | [55]     |
|                                                       | rabbit ( <i>Oryctolagus cuniculus</i> )                                           | 7% (28)                              | [55]     |
|                                                       | woodmouse ( <i>Apodemus sylvaticus</i> )                                          | 16% (230)                            | [56]     |
|                                                       | bank vole ( <i>Clethrionomys glareolus</i> )                                      | 51% (114)                            | [57]     |
|                                                       | bank vole ( <i>Clethrionomys glareolus</i> )                                      | 10% (123)                            | [56]     |
|                                                       | house mouse ( <i>Mus musculus</i> )                                               | 50% (58)                             | [58]     |
|                                                       | house mouse ( <i>Mus musculus</i> )                                               | 13% (242)                            | [56]     |
|                                                       | wild rodents ( <i>Mus spp.</i> )                                                  | 30% (nr)                             | [59]     |
|                                                       | brown rat ( <i>Rattus norvegicus</i> )                                            | 24% (438)                            | [60]     |
|                                                       | brown rat ( <i>Rattus norvegicus</i> )                                            | 63% (73)                             | [61,62]  |
|                                                       | USA                                                                               | caribou ( <i>Rangifer tarandus</i> ) | 6% (49)* |
| tule elk ( <i>Cervus elaphus nannodes</i> )           |                                                                                   | 20% (40)*                            | [24]     |
| mule deer ( <i>Odocoileus hemionus</i> )              |                                                                                   | 13% (38)*                            | [24]     |
| white-tailed deer ( <i>Odocoileus virginianus</i> )   |                                                                                   | 11% (91)*                            | [64]     |
| white-tailed deer ( <i>Odocoileus virginianus</i> )   |                                                                                   | 5% (360)                             | [26]     |
| white-tailed deer ( <i>Odocoileus virginianus</i> )   |                                                                                   | 9% (34)                              | [26]     |
| deer ( <i>spp.</i> not reported)                      |                                                                                   | 3 (not reported)*                    | [65]     |
| fox ( <i>spp.</i> not reported)                       |                                                                                   | 8% (76)*                             | [66]     |
| striped skunk ( <i>Mephitis mephitis</i> )            |                                                                                   | 50% (2)*                             | [64]     |
| california sea lion ( <i>Zalophus californianus</i> ) |                                                                                   | 50% (6)*                             | [29]     |
| raccoon ( <i>Procyon lotor</i> )                      |                                                                                   | 13% (100)                            | [67]     |
| raccoon ( <i>Procyon lotor</i> )                      |                                                                                   | 20% (5)*                             | [64]     |
| raccoon ( <i>Procyon lotor</i> )                      |                                                                                   | 4% (51)*                             | [66]     |
| beaver ( <i>Castor canadensis</i> )                   |                                                                                   | 0% (87)                              | [66]     |
| house mouse ( <i>Mus musculus</i> )                   |                                                                                   | 30% (115)                            | [68]     |
| muskrat ( <i>Ondatra zibethicus</i> )                 |                                                                                   | 100% (6)*                            | [64]     |
| muskrat ( <i>Ondatra zibethicus</i> )                 |                                                                                   | 8% (237)*                            | [66]     |
| otter ( <i>spp.</i> not reported)                     |                                                                                   | 0% (20)                              | [66]     |
| white-foot mouse ( <i>Peromyscus leucopus</i> )       |                                                                                   | 60% (2)*                             | [64]     |
| cotton rat ( <i>Sigmodon hispidus</i> )               |                                                                                   | 11% (9)                              | [69]     |
| ground squirrel ( <i>Spermophilus beecheyi</i> )      |                                                                                   | 16% (309)*                           | [70]     |
| eastern chipmunk ( <i>Tamias striatus</i> )           |                                                                                   | 60% (5)*                             | [64]     |

#### Table References

- 1 Milstein, T.C. and Goldsmid, J.M. (1997) Parasites of feral cats from southern Tasmania and their potential significance. *Aust. Vet. J.* 75, 218–219
- 2 Adams, P.J. *et al.* (2004) Cyst morphology and sequence analysis of the small subunit rDNA and efl alpha identifies a novel *Giardia* genotype in a quenda (*Isodon obesulus*) from Western Australia. *Infect. Genet. Evol.* 4, 365–370
- 3 Moro, D. *et al.* (2003) Pathogens of house mice on arid Boullanger Island and subantarctic Macquarie Island, Australia. *J. Wildl. Dis.* 39, 762–771
- 4 Sogayar, M.I. and Yoshida, E.L. (1995) *Giardia* survey in live-trapped small domestic and wild mammals in four regions in the southwest region of the state of Sao Paulo, Brazil. *Mem. Inst. Oswaldo Cruz* 90, 675–678

- 5 Roach, P.D. *et al.* (1993) Waterborne *Giardia* cysts and *Cryptosporidium* oocysts in the Yukon, Canada. *Appl. Environ. Microbiol.* 59, 67–73
- 6 Olson, M.E. *et al.* (1997) Giardiasis in ringed seals from the western arctic. *J. Wildl. Dis.* 33, 646–648
- 7 Measures, L.N. and Olson, M. (1999) Giardiasis in pinnipeds from eastern Canada. *J. Wildl. Dis.* 35, 779–782
- 8 Dixon, B.R. *et al.* (1997) A comparison of conventional microscopy, immunofluorescence microscopy and flow cytometry in the detection of *Giardia lamblia* cysts in beaver fecal samples. *J. Immunol. Methods* 202, 27–33
- 9 Wallis, P.M. *et al.* (1984) Reservoirs of *Giardia spp.* in southwestern Alberta. *J. Wildl. Dis.* 20, 279–283
- 10 Wallis, P.M. *et al.* (1986) Cysts of *Giardia spp.* in mammals and surface waters in southwestern Alberta. *J. Wildl. Dis.* 22, 115–118
- 11 Isaac-Renton, J.L. *et al.* (1993) Characterization of *Giardia duodenalis* isolates from a waterborne outbreak. *J. Infect. Dis.* 167, 431–440
- 12 Abd el-Wahed, M.M. *et al.* (1999) The role of wild rats as a reservoir of some internal parasites in Qalyobia governorate. *J. Egypt. Soc. Parasitol.* 29, 495–503
- 13 Karanis, P. *et al.* (1996) Possible contamination of surface waters with *Giardia spp.* through muskrats. *Zentralbl. Bakteriolog.* 284, 302–306
- 14 Ito, M. and Itagaki, T. (2003) Survey on wild rodents for endoparasites in Iwate Prefecture, Japan. *J. Vet. Med. Sci.* 65, 1151–1153
- 15 Rosell, F. *et al.* (2001) Investigations of waterborne pathogens in Eurasian beaver (*Castor fiber*) from Telemark County, southeast Norway. *Acta Vet. Scand.* 42, 479–482
- 16 Bajer, A. *et al.* (2002) Prevalence and abundance of *Cryptosporidium parvum* and *giardia spp.* in wild rural rodents from the Mazury Lake District region of Poland. *Parasitology* 125, 21–34
- 17 Sleeman, J.M. *et al.* (2000) Gastrointestinal parasites of mountain gorillas (*Gorilla gorilla beringei*) in the Parc National des Volcans, Rwanda. *J. Zoo Wildl. Med.* 31, 322–328
- 18 Nasher, A.K. (1988) Zoonotic parasite infections of the Arabian sacred baboon *Papio hamadryas arabicus* Thomas in Asir Province, Saudi Arabia. *Ann. Parasitol. Hum. Comp.* 63, 448–454
- 19 Ghandour, A.M. *et al.* (1995) Zoonotic intestinal parasites of hamadryas baboons *Papio hamadryas* in the western and northern regions of Saudi Arabia. *J. Trop. Med. Hyg.* 98, 431–439
- 20 Patton, S. and Rabinowitz, A.R. (1994) Parasites of wild felidae in Thailand: a coprological survey. *J. Wildl. Dis.* 30, 472–475
- 21 Hope, K. *et al.* (2004) Parasitic health of olive baboons in Bwindi Impenetrable National Park, Uganda. *Vet. Parasitol.* 122, 165–170
- 22 Graczyk, T.K. *et al.* (2001) *Cryptosporidium parvum* genotype 2 infections in free-ranging mountain gorillas (*Gorilla gorilla beringei*) of the Bwindi Impenetrable National Park, Uganda. *Parasitol. Res.* 87, 368–370
- 23 Nizeyi, J.B. *et al.* (1999) *Cryptosporidium sp.* and *Giardia sp.* infections in mountain gorillas (*Gorilla gorilla beringei*) of the Bwindi Impenetrable National Park, Uganda. *J. Parasitol.* 85, 1084–1088
- 24 Deng, M.Q. and Cliver, D.O. (1999) Improved immunofluorescence assay for detection of *Giardia* and *Cryptosporidium* from asymptomatic adult cervine animals. *Parasitol. Res.* 85, 733–736
- 25 Pacha, R.E. *et al.* (1987) Small rodents and other mammals associated with mountain meadows as reservoirs of *Giardia spp.* and *Campylobacter spp.* *Appl. Environ. Microbiol.* 53, 1574–1579
- 26 Rickard, L.G. *et al.* (1999) The prevalence of *Cryptosporidium* and *Giardia spp.* in fecal samples from free-ranging white-tailed deer (*Odocoileus virginianus*) in the southeastern United States. *J. Vet. Diagn. Invest.* 11, 65–72
- 27 Trout, J.M. *et al.* (2003) Identification of assemblage A *Giardia* in white-tailed deer. *J. Parasitol.* 89, 1254–1255
- 28 Santin, M. *et al.* (2003) First report of *Giardia* in coyotes (*Canis latrans*). *J. Eukaryot. Microbiol.* 50 (Suppl), 709
- 29 Deng, M.Q. *et al.* (2000) First findings of *Cryptosporidium* and *Giardia* in California sea lions (*Zalophus californianus*). *J. Parasitol.* 86, 490–494
- 30 Robel, R.J. *et al.* (1989) Gastrointestinal helminths and protozoa from two raccoon populations in Kansas. *J. Parasitol.* 75, 1000–1003
- 31 Pinter, A.J. *et al.* (1988) Intestinal parasites of small mammals from Grand Teton National Park. *J. Parasitol.* 74, 187–188
- 32 Dunlap, B.G. and Thies, M.L. (2002) *Giardia* in beaver (*Castor canadensis*) and nutria (*Myocastor coypus*) from east Texas. *J. Parasitol.* 88, 1254–1258
- 33 Erlandsen, S.L. *et al.* (1990) Prevalence of *Giardia spp.* in beaver and muskrat populations in northeastern states and Minnesota: detection of intestinal trophozoites at necropsy provides greater sensitivity than detection of cysts in fecal samples. *Appl. Environ. Microbiol.* 56, 31–36
- 34 Howerth, E.W. *et al.* (1994) Survey for selected diseases in nutria (*Myocastor coypus*) from Louisiana. *J. Wildl. Dis.* 30, 450–453
- 35 Monzingo, D.L., Jr and Hibler, C.P. (1987) Prevalence of *Giardia sp.* in a beaver colony and the resulting environmental contamination. *J. Wildl. Dis.* 23, 576–585
- 36 Pacha, R.E. *et al.* (1985) Occurrence of *Campylobacter jejuni* and *Giardia* species in muskrat (*Ondatra zibethica*). *Appl. Environ. Microbiol.* 50, 177–178
- 37 Power, M.L. *et al.* (2004) Genetic characterisation of *Cryptosporidium* from a wild population of eastern grey kangaroos *Macropus giganteus* inhabiting a water catchment. *Infect. Genet. Evol.* 4, 59–67
- 38 Korsholm, H. and Henriksen, S.A. (1984) Infection with *Cryptosporidium* in Roe deer (*Capreolus capreolus* L.). A preliminary report. *Nordisk. Vet.* 36, 266
- 39 Legesse, M. and Erko, B. (2004) Zoonotic intestinal parasites in *Papio anubis* (baboon) and *Cercopithecus aethiops* (vervet) from four localities in Ethiopia. *Acta Trop.* 90, 231–236
- 40 Laakkonen, J. *et al.* (1994) Prevalence of *Cryptosporidium sp.* in peak density *Microtus agrestis*, *Microtus oeconomus* and *Clethrionomys glareolus* populations. *J. Wildl. Dis.* 30, 110–111

- 41 Bertolino, S. *et al.* (2003) Prevalence of coccidia parasites (Protozoa) in red squirrels (*Sciurus vulgaris*): effects of host phenotype and environmental factors. *Oecologia* 137, 286–295
- 42 Nakai, Y. *et al.* (2004) Detection of *Cryptosporidium muris* type oocysts from beef cattle in a farm and from domestic and wild animals in and around the farm. *J. Vet. Med. Sci.* 66, 983–984
- 43 Iseki, M. (1986) Two species of *Cryptosporidium* naturally infecting house rats, *Rattus norvegicus*. *Jpn. J. Parasitol* 35, 521–526
- 44 Miyaji, S. *et al.* (1989) Prevalence of *Cryptosporidium* in *Rattus rattus* and *R. norvegicus* in Japan. *Jpn. J. Parasitol* 38, 368–372
- 45 Yamura, H. *et al.* (1990) Prevalence of *Cryptosporidium* infection among house rats, *Rattus rattus* and *R. norvegicus*, in Tokyo, Japan and experimental cryptosporidiosis in roof rats. *Jpn. J. Parasitol.* 39, 439–444
- 46 Muriuki, S.M. *et al.* (1997) The presence of *Cryptosporidium* oocysts in stools of clinically diarrhoeic and normal nonhuman primates in Kenya. *Vet. Parasitol.* 72, 141–147
- 47 Muriuki, S.M. *et al.* (1998) Some gastro-intestinal parasites of zoonotic (public health) importance commonly observed in old world non-human primates in Kenya. *Acta Trop.* 71, 73–82
- 48 Rhee, J.K. *et al.* (1991) *Kisaengchunghak Chapchi* 29, 139–148
- 49 Kemper, N. *et al.* (2004) Prevalence of enteropathogenic bacteria and *Cryptosporidium* species in moose (*Alces alces*) in Norway. *Vet. Rec.* 154, 827–828
- 50 Sinski, E. (1993) Cryptosporidiosis in Poland: clinical, epidemiologic and parasitologic aspects. *Folia Parasitol. (Praha)* 40, 297–300
- 51 Sinski, E. *et al.* (1998) The role of wild rodents in ecology of Cryptosporidiosis in Poland. *Folia Parasitol. (Praha)* 45, 173–174
- 52 Bajer, A. *et al.* (2003) Preliminary molecular characterization of *Cryptosporidium parvum* isolates of wildlife rodents from Poland. *J. Parasitol.* 89, 1053–1055
- 53 Torres, J. *et al.* (2000) The occurrence of *Cryptosporidium parvum* and *C. muris* in wild rodents and insectivores in Spain. *Vet. Parasitol.* 92, 253–260
- 54 Mtambo, M.M. *et al.* (1997) Prevalence of *Cryptosporidium spp.* oocysts in cattle and wildlife in Morogoro region, Tanzania. *Prev. Vet. Med.* 31, 185–190
- 55 Sturdee, A.P. *et al.* (1999) Detection of *Cryptosporidium* oocysts in wild mammals of mainland Britain. *Vet. Parasitol.* 80, 273–280
- 56 Chalmers, R.M. *et al.* (1997) The prevalence of *Cryptosporidium parvum* and *C. muris* in *Mus domesticus*, *Apodemus sylvaticus* and *Clethrionomys glareolus* in an agricultural system. *Parasitol. Res.* 83, 478–482
- 57 Bull, S. *et al.* (1998) A survey of *Cryptosporidium* species in Skomer bank voles (*Clethrionomys glareolus skomerensis*). *J. Zool.* 244, 119–122
- 58 Chalmers, R. *et al.* (1994) *Cryptosporidium muris* in wild house mice (*Mus musculus*) First report in the UK. *Eur. J. Protistol.* 30, 151–155
- 59 Sturdee, A.P. *et al.* (2003) Long-term study of *Cryptosporidium* prevalence on a lowland farm in the United Kingdom. *Vet. Parasitol.* 116, 97–113
- 60 Quy, R.J. *et al.* (1999) The Norway rat as a reservoir host of *Cryptosporidium parvum*. *J. Wildl. Dis.* 35, 660–670
- 61 Webster, J.P. (1996) Wild brown rats (*Rattus norvegicus*) as a zoonotic risk on farms in England and Wales. *Commun. Dis. Rep. CDR Rev.* 6, R46–R49
- 62 Webster, J.P. and Macdonald, D.W. (1995) Cryptosporidiosis reservoir in wild brown rats (*Rattus norvegicus*) in the UK. *Epidemiol. Infect.* 115, 207–209
- 63 Siefker, C. *et al.* (2002) Molecular characterization of *Cryptosporidium sp.* isolated from northern Alaskan caribou (*Rangifer tarandus*). *J. Parasitol.* 88, 213–216
- 64 Perz, J.F. and Le Blancq, S.M. (2001) *Cryptosporidium parvum* infection involving novel genotypes in wildlife from lower New York State. *Appl. Environ. Microbiol.* 67, 1154–1162
- 65 Jellison, K.L. *et al.* (2002) Sources and species of *Cryptosporidium* oocysts in the Wachusett Reservoir watershed. *Appl. Environ. Microbiol.* 68, 569–575
- 66 Zhou, L. *et al.* (2004) Genotypes of *Cryptosporidium* species infecting fur-bearing mammals differ from those of species infecting humans. *Appl. Environ. Microbiol.* 70, 7574–7577
- 67 Snyder, D.E. (1988) Indirect immunofluorescent detection of oocysts of *Cryptosporidium parvum* in the feces of naturally infected raccoons (*Procyon lotor*). *J. Parasitol.* 74, 1050–1052
- 68 Klesius, P.H. *et al.* (1986) Infectivity of *Cryptosporidium sp* isolated from wild mice for calves and mice. *J. Am. Vet. Med. Assoc.* 189, 192–193
- 69 Elangbam, C.S. *et al.* (1993) Cryptosporidiosis in a cotton rat (*Sigmodon hispidus*). *J. Wildl. Dis.* 29, 161–164
- 70 Atwill, E.R. *et al.* (2001) Quantitative shedding of two genotypes of *Cryptosporidium parvum* in California ground squirrels (*Spermophilus beecheyi*). *Appl. Environ. Microbiol.* 67, 2840–2843

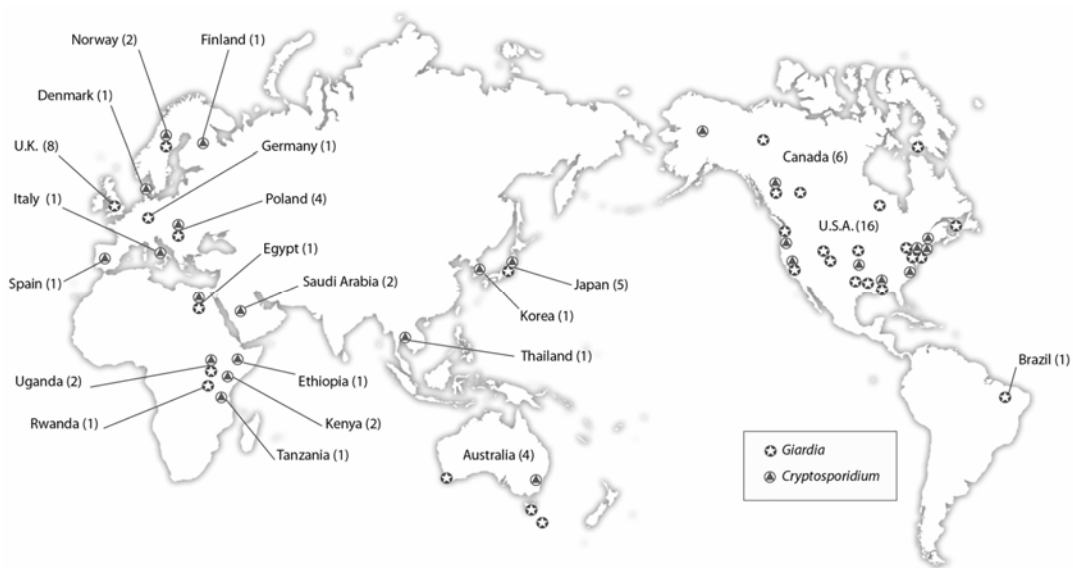

**Supplementary Figure 1.** A selection of *Giardia* and *Cryptosporidium* prevalence studies undertaken on free-living mammalian wildlife during the past 20 years. The number of surveys conducted in each country is listed in brackets beside the country name. Of the 68 studies represented, only ten of the *Giardia* studies and 18 of the *Cryptosporidium* surveys were undertaken at the molecular level. Future studies of wildlife that incorporate molecular analysis are paramount for refining the host range, transmission dynamics and zoonotic potential of known and novel *Giardia* and *Cryptosporidium* species and genotypes. Therefore, future studies must be undertaken in defined locations in which host assemblages and their interactions are well understood so that the results of genotyping studies can be put into an ecological context.
